# Supplementary material for: A positive feedback loop between mTORC1 and cathelicidin promotes skin inflammation in rosacea
Source: PubMed Central journal article supplement (PMC8103105; doi:10.15252/emmm.202013560), 2021-03-18
Supplement: EMMM-13-e13560-s002.pdf [file EMMM-13-e13560-s002.pdf]

## Appendix

Table of contents:

Appendix Figure S1. mTORC1 signaling is hyperactivated in the lesional skin of rosacea.

Appendix Figure S2. Deficiency of mTORC1 suppresses rosacea development.

Appendix Figure S3. Hyperactivation of mTORC1 aggravates rosacea development.

Appendix Figure S4. mTORC1 regulates cathelicidin LL37 through a positive feedback circuit.

Appendix Figure S5. Cathelicidin LL37 stimulates mTORC1 via binding to TLR2.

Appendix Figure S6. Cathelicidin LL37 induces NF- $\kappa$ B signaling via mTORC1 in keratinocytes.

Appendix Figure S7. Cathelicidin LL37 induces chemokines and cytokines via mTORC1 in keratinocytes.

Appendix Table S1. Information of patients and healthy individuals skin samples.

Appendix Table S2. List of qPCR primers in this study.

Appendix Table S3. CEA and IGA score and score change for rosacea patients after topical rapamycin treatment.

Appendix Table S4. Summary of significant P values for Main and appendix figures.

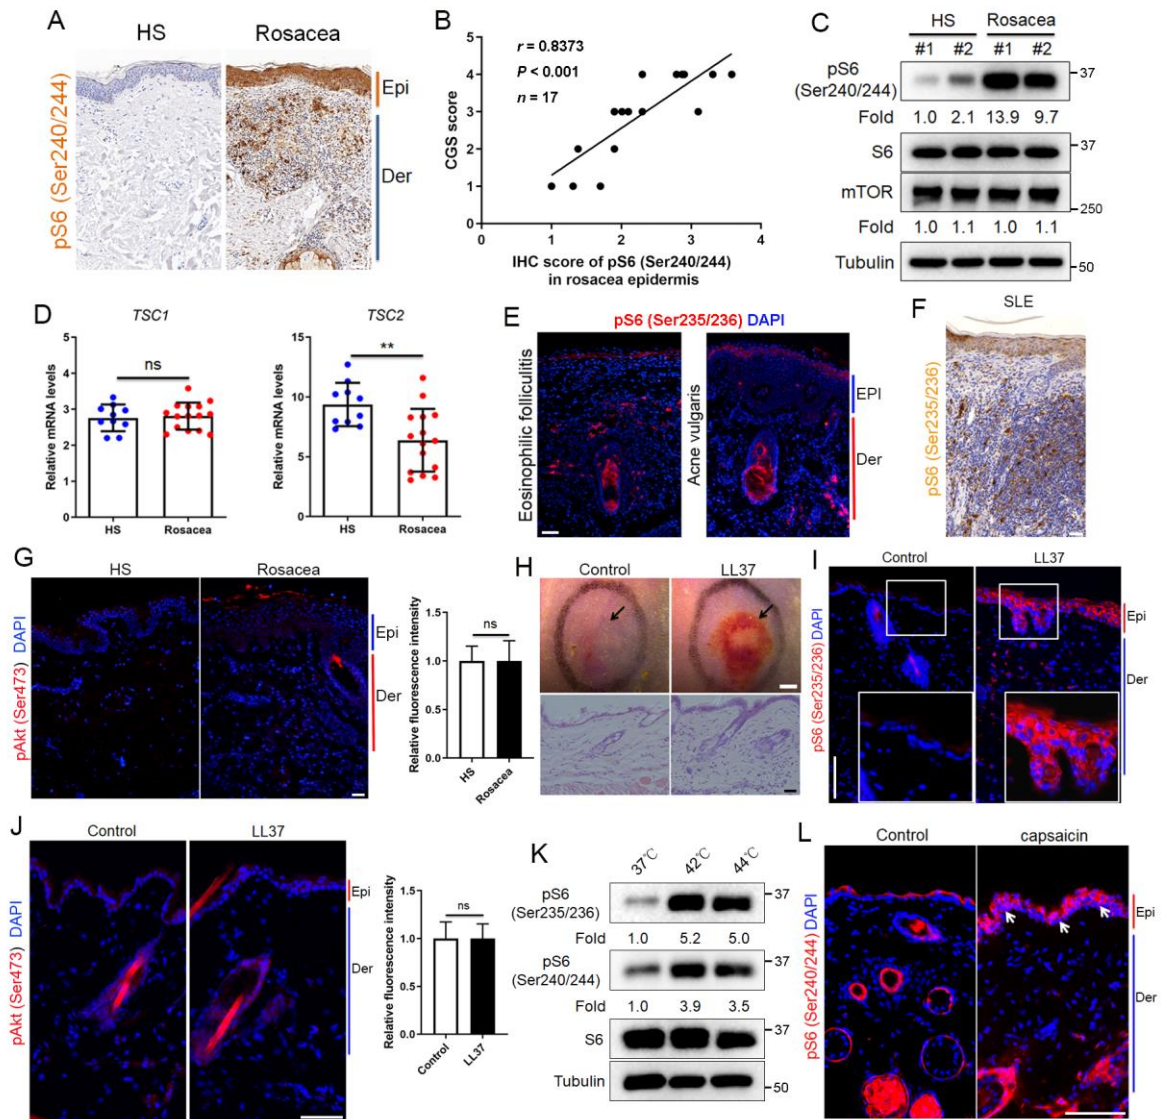

### Appendix Figure S1. mTORC1 signaling is hyperactivated in the lesional skin of rosacea.

(A) Immunohistochemistry of pS6 (Ser240/244) on skin sections from healthy individuals (HS) and patients with rosacea. Scale bar: 50  $\mu$ m. (B) Correlation of pS6 (Ser240/244) expression (from IHC) in the epidermis of human rosacea lesions ( $n = 17$ ) with the Clinician's Global Severity (CGS) scores. (C) Immunoblotting analysis of pS6 (Ser240/244), S6 and mTOR in skin samples from HS and rosacea patients. pS6 and mTOR protein levels were analyzed relative to total S6 and Tubulin respectively. Tubulin is the loading control. (D) The mRNA expression levels of *TSC1* and *TSC2* in skin lesions from healthy individuals ( $n = 10$ ) and patients with rosacea ( $n = 15$ ). (E) Immunostaining of pS6 on skin sections from patients with acne vulgaris or eosinophilic folliculitis. Scale bar: 50  $\mu$ m. (F) IHC of pS6 on skin sections from patients with lupus erythematosus. Scale bar: 50  $\mu$ m. (G) Immunostaining of p-Akt (Ser473) on skin sections from healthy

individuals and patients with rosacea. Right panel, the quantification of relative fluorescence intensity for pAkt (Ser473) in HS and rosacea patients skin sections (n=5 for each group). Scale bar: 50  $\mu$ m. **(H)** Top: The back skins of BALB/c WT mice were intradermally injected with LL37 or control vehicle. Scale bar: 2 mm. Bottom: HE staining of lesional skin sections. Scale bar: 50  $\mu$ m. **(I)** Immunostaining of pS6 (Ser235/236) in skin lesions from control and LL37-induced mice. Bottom right panels, magnified images of boxed areas. Scale bar: 50  $\mu$ m. **(J)** Immunostaining of p-Akt (Ser473) on skin sections from control and LL37-induced mice. Right panel, the quantification of relative fluorescence intensity for pAkt (Ser473) (n=5 for each group). Scale bar: 50  $\mu$ m. **(K)** Immunoblotting analysis of pS6 and total S6 in cell lysates from primary human keratinocytes stimulated with heat shock (37 – 44  $^{\circ}$ C) for 2 h. pS6 protein levels were analyzed relative to total S6. **(L)** Immunostaining of pS6 (Ser240/244) in skin lesions from control and LL37-induced mice topically applied with 0.1% capsaicin or placebo cream (n=6 for each group). DAPI staining (blue) indicates nuclear localization. Scale bar: 50  $\mu$ m.

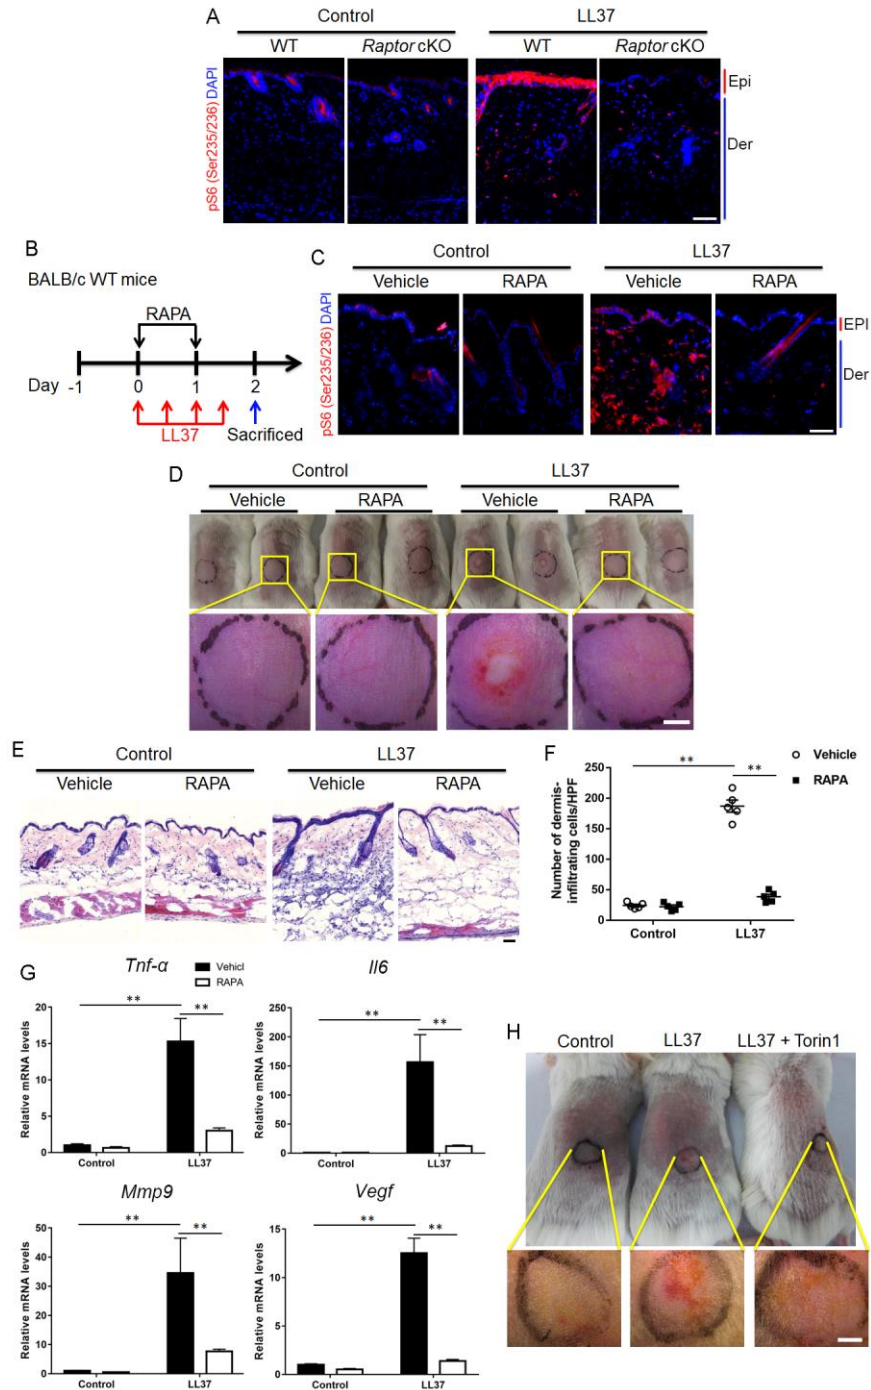

## Appendix Figure S2. Deficiency of mTORC1 suppresses rosacea development.

(A) Immunostaining of pS6 in skin sections from WT and *Raptor* cKO mice injected with LL37 or control vehicle (n=6). Scale bar: 50  $\mu$ m. (B) Schematic diagram of intraperitoneal administration of rapamycin (RAPA) on day 0 and 1 during the intradermal injection of LL37 in mice (BALB/c). 6-8 mice in each group were sacrificed on day 2 to conduct subsequent experiments. (C) Immunostaining of pS6 in skin sections from LL37-injected mice administrated with RAPA or vehicle. Scale bar: 50  $\mu$ m. (D) The back skins of

mice treated with RAPA or vehicle, were intradermally injected with LL37. Images were taken 48 h after the first LL37 injection. Below panels, magnified images of yellow boxed areas. Scale bar: 2 mm. (E) HE staining of lesional skin sections from LL37-treated mice injected with RAPA or vehicle. Scale bar: 50  $\mu$ m. (F) Dermal infiltrating cells were quantified (n = 5). (G) The mRNA expression levels of *Tnf- $\alpha$* , *Il6*, *Mmp9* and *Vegf* in skin lesions (n = 6-8). (H) The back skins of mice treated with torin1 or vehicle, were intradermally injected with LL37 (n=5 for each group). Images were taken 48 h after the first LL37 injection. Below panels, magnified images of black circled areas. Scale bar: 2 mm. All results are representative of at least 3 independent experiments. Data represent the mean  $\pm$  SEM. \*\*P < 0.01. 1-way ANOVA with Bonferroni's post hoc test was used.

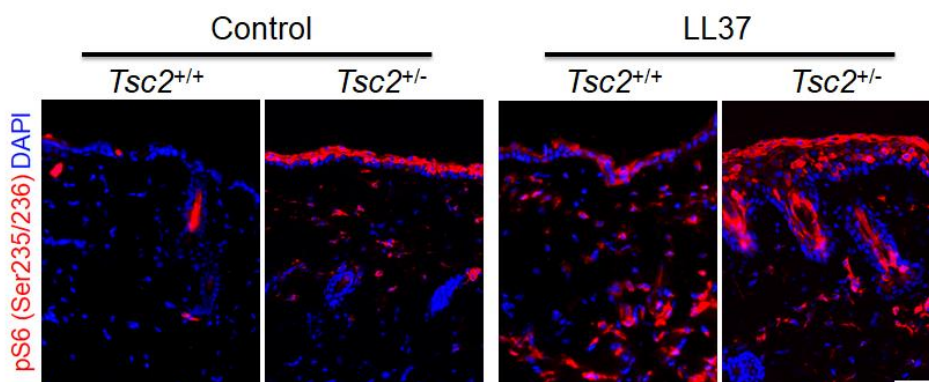

### Appendix Figure S3. Hyperactivation of mTORC1 aggravates rosacea development.

Immunostaining of pS6 in lesional skin sections from *Tsc2*<sup>+/+</sup> and *Tsc2*<sup>+/-</sup> mice injected with LL37 or control vehicle. DAPI staining (blue) indicates nuclear localization. Scale bar: 50  $\mu$ m.

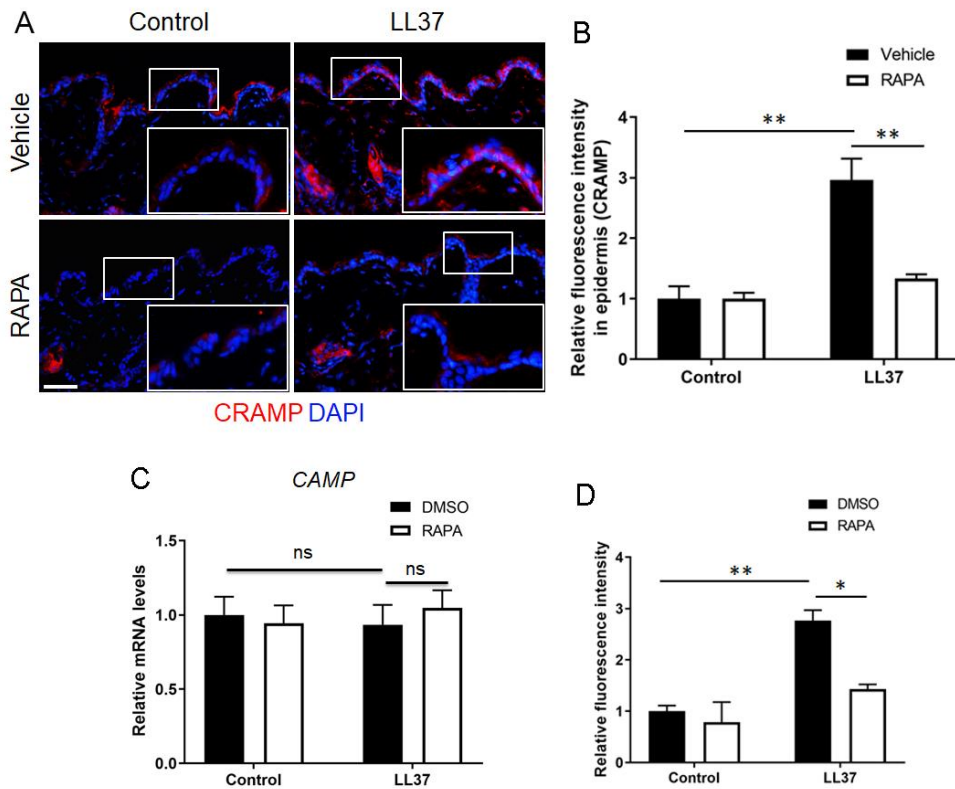

**Appendix Figure S4. mTORC1 regulates cathelicidin LL37 through a positive feedback circuit.**

(A) Immunostaining of mouse CRAMP in skin sections from LL37-injected mice administrated with RAPA or vehicle. DAPI staining (blue) indicates nuclear localization. Scale bar: 50  $\mu$ m. (B) Quantification of relative fluorescence intensity for CRAMP in epidermis (n = 6). (C) mRNA expression levels of *CAMP* in primary human keratinocytes treated with LL37  $\pm$  RAPA. (D) Quantification of relative fluorescence intensity of cathelicidin (related to Fig 4G). All results are representative of at least 3 independent experiments. Data represent the mean  $\pm$  SEM. \*P < 0.05, \*\*P < 0.01. “ns” indicates no statistical significance. 1-way ANOVA with Bonferroni’s post hoc test was used.

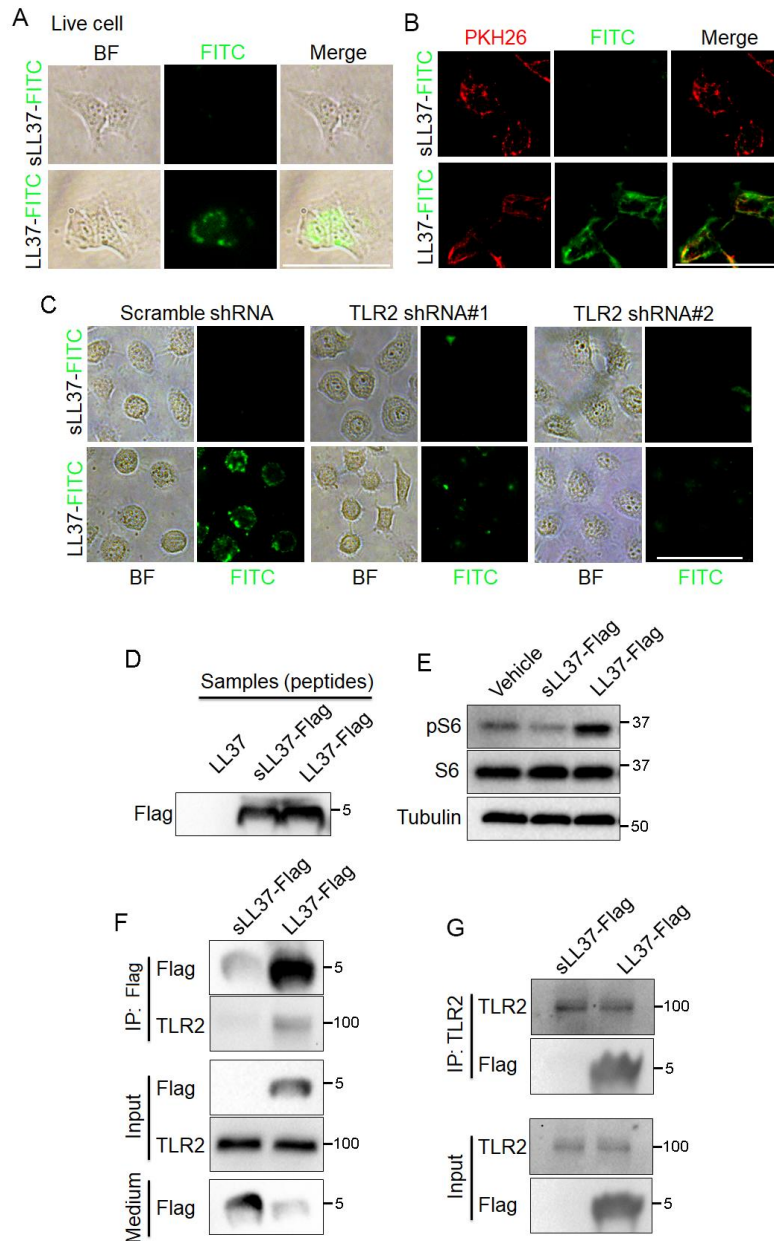

**Appendix Figure S5. Cathelicidin LL37 stimulates mTORC1 via binding to TLR2.**

(A) Representative images showing cellular localization of LL37 or sLL37 analyzed by fluorescent microscope in live HaCaT keratinocytes treated with FITC-labeled LL37 or sLL37 (4  $\mu$ M) for 30 min followed by PBS washed. BF, bright field. Scale bar: 50  $\mu$ m. (B) Representative images showing membrane localization of LL37 or sLL37 in live HaCaT keratinocytes treated with FITC-labeled LL37 / sLL37 and PKH26 for 30 min. Scale bar: 50  $\mu$ m. (C) HaCaT keratinocytes expressing TLR2 shRNAs or scramble shRNA were treated with FITC-labeled LL37 or sLL37 for 30 min followed by PBS washed, then live cells were analyzed by fluorescent microscope. Scale bar: 50  $\mu$ m. (D) Immunoblotting analysis of flag in peptide

samples (LL37, sLL37-flag and LL37-flag). (E) Immunoblotting of pS6 (Ser235/236) and total S6 in cell lysates from HaCaT keratinocytes treated with sLL37-flag and LL37-flag for 2 h. (F and G) HaCaT keratinocyte cells were incubated with sLL37-flag or LL37-flag for 1 h. Cell lysates were immunoprecipitated with anti-flag or anti-TLR2 antibodies, showing an interaction between LL37 and TLR2. Medium, the medium of HaCaT keratinocytes treated with sLL37-flag or LL37-flag. All results are representative of at least 3 independent experiments.

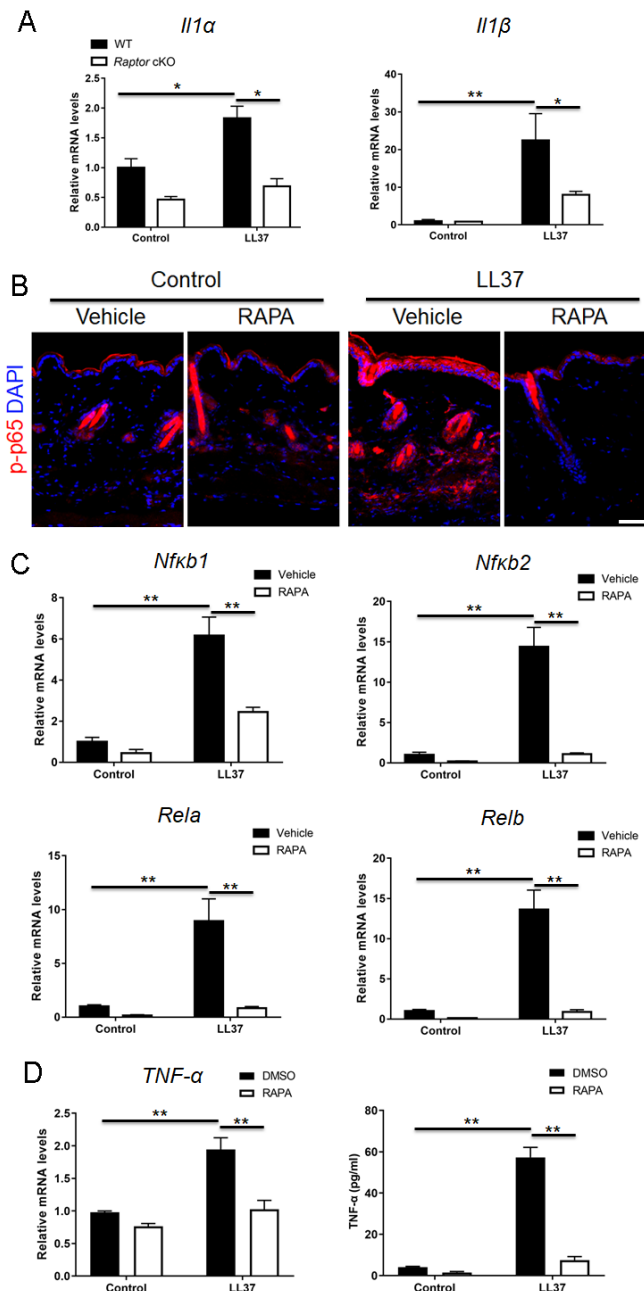



**Appendix Figure S6. Cathelicidin LL37 induces NF- $\kappa$ B signaling via mTORC1 in keratinocytes.**

(A) The mRNA expression levels of NF- $\kappa$ B target genes (*Il1 $\alpha$*  and *Il1 $\beta$* ) in WT or *Raptor* cKO mice skin injected with LL37 or control vehicle (n=6). (B) Immunostaining of p-p65 in skin sections from LL37-injected mice administrated with RAPA or vehicle. Scale bar: 50  $\mu$ m. (C) The mRNA expression levels of NF- $\kappa$ B family of transcription factors (*Nfkb1*, *Nfkb1*, *Rela* and *Relb*) in skin lesions (n=6). (D) The mRNA levels (left) and medium protein levels (right) of TNF- $\alpha$  in primary human keratinocytes treated with LL37  $\pm$  RAPA. All results are representative of at least 3 independent experiments. Data represent the mean  $\pm$  SEM. \*\*P < 0.01. 1-way ANOVA with Bonferroni's post hoc test was used.

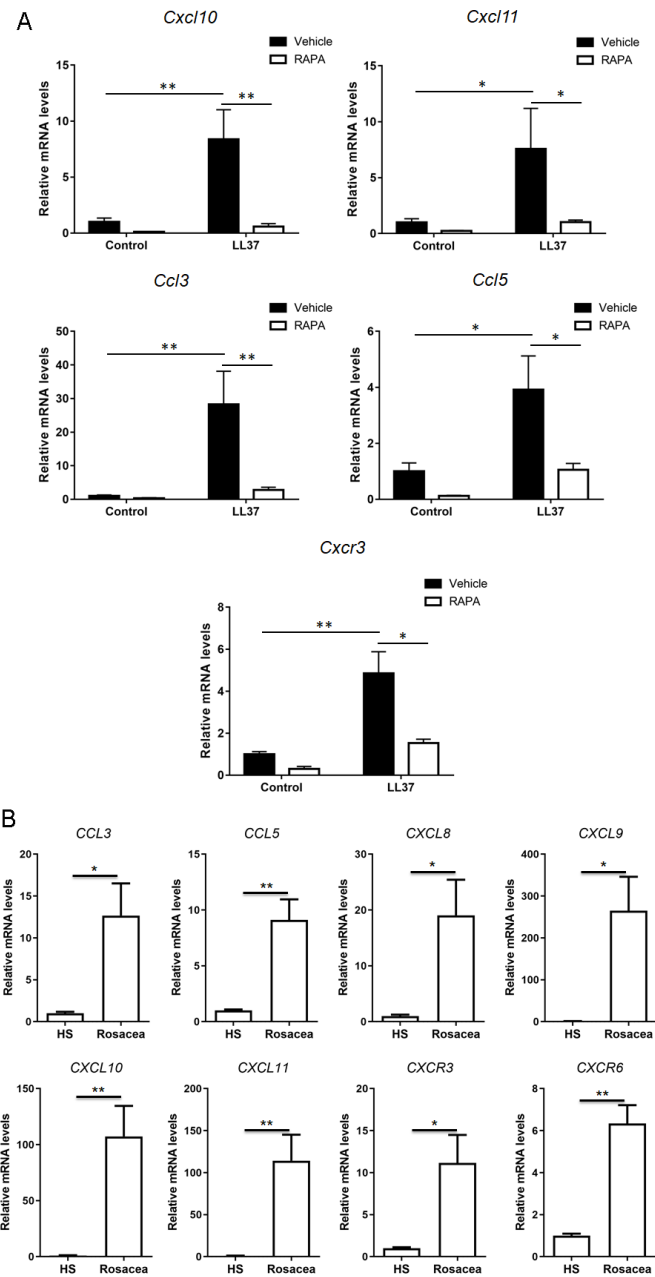

**Appendix Figure S7. Cathelicidin LL37 induces chemokines and cytokines via mTORC1 in keratinocytes.**

(A) The mRNA expression levels of mouse chemokines (Cxcl10, Cxcl11, Ccl3, Ccl5 and Cxcr3) in skin lesions (n=6). (B) The mRNA expression levels of rosacea-associated chemokines and cytokines in HS (n=10) and rosacea patient (n=15) skins detected by qPCR. All results are representative of at least 3 independent experiments. Data represent the mean  $\pm$  SEM. \*P < 0.05, \*\*P < 0.01. two-tailed unpaired Student's t-test (B) or 1-way ANOVA with Bonferroni's post hoc test (A) was used.

**Appendix Table S1. Information of patients and healthy individuals skin samples.**

| Sample ID | Sample classification | Age/Gender | CGS score      | Application    |
|-----------|-----------------------|------------|----------------|----------------|
| 1         | HS                    | 27/Female  | Not applicable | RNA-sequencing |
| 2         | HS                    | 40/Female  | Not applicable | RNA-sequencing |
| 3         | HS                    | 23/Female  | Not applicable | RNA-sequencing |
| 4         | HS                    | 27/Female  | Not applicable | RNA-sequencing |
| 5         | HS                    | 30/Female  | Not applicable | RNA-sequencing |
| 6         | HS                    | 21/Female  | Not applicable | RNA-sequencing |
| 7         | HS                    | 31/Female  | Not applicable | RNA-sequencing |
| 8         | HS                    | 49/Female  | Not applicable | RNA-sequencing |
| 9         | HS                    | 27/Female  | Not applicable | RNA-sequencing |
| 10        | HS                    | 46/Female  | Not applicable | RNA-sequencing |
| 11        | HS                    | 28/Female  | Not applicable | RT-qPCR        |
| 12        | HS                    | 42/Female  | Not applicable | RT-qPCR        |
| 13        | HS                    | 31/Female  | Not applicable | RT-qPCR        |
| 14        | HS                    | 27/Female  | Not applicable | RT-qPCR        |
| 15        | HS                    | 23/Female  | Not applicable | RT-qPCR        |
| 16        | HS                    | 32/Female  | Not applicable | RT-qPCR        |
| 17        | HS                    | 29/Female  | Not applicable | RT-qPCR        |
| 18        | HS                    | 33/Female  | Not applicable | RT-qPCR        |
| 19        | HS                    | 21/Female  | Not applicable | RT-qPCR        |
| 20        | HS                    | 40/Female  | Not applicable | RT-qPCR        |
| 21        | HS                    | 22/Female  | Not applicable | IHC/IF         |
| 22        | HS                    | 47/Female  | Not applicable | IHC/IF         |
| 23        | HS                    | 30/Female  | Not applicable | IHC/IF         |
| 24        | HS                    | 32/Female  | Not applicable | IHC/IF         |
| 25        | HS                    | 27/Female  | Not applicable | IHC/IF         |
| 26        | HS                    | 41/Female  | Not applicable | IHC/IF         |
| 27        | HS                    | 40/Female  | Not applicable | IHC/IF         |
| 28        | HS                    | 21/Female  | Not applicable | IHC/IF         |
| 29        | Rosacea               | 45/Female  | 3              | RNA-sequencing |
| 30        | Rosacea               | 45/Female  | 2              | RNA-sequencing |
| 31        | Rosacea               | 50/Female  | 3              | RNA-sequencing |
| 32        | Rosacea               | 36/Female  | 3              | RNA-sequencing |
| 33        | Rosacea               | 42/Female  | 4              | RNA-sequencing |
| 34        | Rosacea               | 30/Female  | 2              | RNA-sequencing |
| 35        | Rosacea               | 36/Female  | 2              | RNA-sequencing |
| 36        | Rosacea               | 24/Female  | 4              | RNA-sequencing |
| 37        | Rosacea               | 20/Female  | 1              | RNA-sequencing |
| 38        | Rosacea               | 29/Female  | 3              | RNA-sequencing |
| 39        | Rosacea               | 46/Female  | 3              | RT-qPCR        |

|    |                           |           |         |         |
|----|---------------------------|-----------|---------|---------|
| 40 | Rosacea                   | 25/Female | 2       | RT-qPCR |
| 41 | Rosacea                   | 38/Female | 4       | RT-qPCR |
| 42 | Rosacea                   | 48/Female | 1       | RT-qPCR |
| 43 | Rosacea                   | 29/Female | 3       | RT-qPCR |
| 44 | Rosacea                   | 26/Female | 3       | IHC/IF  |
| 45 | Rosacea                   | 34/Female | 2       | IHC/IF  |
| 46 | Rosacea                   | 23/Female | 4       | IHC/IF  |
| 47 | Rosacea                   | 26/Female | 3       | IHC/IF  |
| 48 | Rosacea                   | 37/Female | 2       | IHC/IF  |
| 49 | Rosacea                   | 49/Female | 4       | IHC/IF  |
| 50 | Rosacea                   | 42/Female | 4       | IHC/IF  |
| 51 | Rosacea                   | 29/Female | 3       | IHC/IF  |
| 52 | Rosacea                   | 33/Female | 4       | IHC/IF  |
| 53 | Rosacea                   | 36/Female | 1       | IHC/IF  |
| 54 | Rosacea                   | 34/Female | 3       | IHC/IF  |
| 55 | Rosacea                   | 43/Female | 3       | IHC/IF  |
| 56 | Rosacea                   | 35/Female | 1       | IHC/IF  |
| 57 | Rosacea                   | 29/Female | 4       | IHC/IF  |
| 58 | Rosacea                   | 41/Female | 1       | IHC/IF  |
| 59 | Rosacea                   | 24/Female | 4       | IHC/IF  |
| 60 | Rosacea                   | 30/Female | 3       | IHC/IF  |
| 61 | Acne vulgaris             | 31/Female | Typical | IHC/IF  |
| 62 | Acne vulgaris             | 27/Female | Typical | IHC/IF  |
| 63 | Acne vulgaris             | 35/Female | Typical | IHC/IF  |
| 64 | Eosinophilic folliculitis | 32/Female | Typical | IHC/IF  |
| 65 | Eosinophilic folliculitis | 22/Female | Typical | IHC/IF  |
| 66 | Eosinophilic folliculitis | 29/Female | Typical | IHC/IF  |
| 67 | Lupus erythematosus       | 40/Female | Typical | IHC/IF  |
| 68 | Lupus erythematosus       | 28/Female | Typical | IHC/IF  |
| 69 | Lupus erythematosus       | 36/Female | Typical | IHC/IF  |

**Appendix Table S2. List of qPCR primers in this study.**

|                         |                        |
|-------------------------|------------------------|
| Human- <i>GAPDH</i> -F  | TGTTGCCATCAATGACCCCTT  |
| Human - <i>GAPDH</i> -R | CTCCACGACGTACTCAGCG    |
| Human- <i>CAMP</i> -F   | GGCTGGTGAAGCGGTGTAT    |
| Human - <i>CAMP</i> -R  | TGGGTACAAGATTCCGCAAAAA |
| Human- <i>CXCL8</i> -F  | TTTTGCCAAGGAGTGCTAAAGA |
| Human - <i>CXCL8</i> -R | AACCCTCTGCACCCAGTTTTTC |
| Human- <i>CXCL9</i> -F  | CCAGTAGTGAGAAAGGGTTCGC |
| Human - <i>CXCL9</i> -R | AGGGCTTGGGGCAAATTGTT   |
| Human- <i>CXCL10</i> -F | GTGGCATTCAAGGAGTACCTC  |

|                                          |                          |
|------------------------------------------|--------------------------|
| Human - <i>CXCL10</i> -R                 | TGATGGCCTTCGATTCTGGATT   |
| Human- <i>CXCL11</i> -F                  | GACGCTGTCTTTGCATAGGC     |
| Human - <i>CXCL11</i> -R                 | GGATTTAGGCATCGTTGTCCTTT  |
| Human- <i>CCL2</i> -F                    | CAGCCAGATGCAATCAATGCC    |
| Human - <i>CCL2</i> -R                   | TGGAATCCTGAACCCACTTCT    |
| Human- <i>CCL20</i> -F                   | TGCTGTACCAAGAGTTTGCTC    |
| Human - <i>CCL20</i> -R                  | CGCACACAGACAACCTTTTTCTTT |
| Human- <i>IL6</i> -F                     | CCTGAACCTTCCAAAGATGGC    |
| Human - <i>IL6</i> -R                    | TTCACCAGGCAAGTCTCCTCA    |
| Human- <i>TNF<math>\alpha</math></i> -F  | CCTCTCTCTAATCAGCCCTCTG   |
| Human - <i>TNF<math>\alpha</math></i> -R | GAGGACCTGGGAGTAGATGAG    |
| Human- <i>MMP9</i> -F                    | AGACCTGGGCAGATTCCAAAC    |
| Human - <i>MMP9</i> -R                   | CGGCAAGTCTTCCGAGTAGT     |
| Human- <i>VEGFA</i> -F                   | AGGGCAGAATCATCACGAAGT    |
| Human - <i>VEGFA</i> -R                  | AGGGTCTCGATTGGATGGCA     |
| Human- <i>TSC1</i> -F                    | CAACAAGCAAATGTCGGGGAG    |
| Human - <i>TSC1</i> -R                   | CATAGGGCCACGGTCAGAA      |
| Human- <i>TSC2</i> -F                    | CCAAACCAACAAGCAAAGATTCA  |
| Human - <i>TSC2</i> -R                   | CACATTCCATGCTCAGTTCTCT   |
| Mouse- <i>Gapdh</i> -F                   | AGGTCGGTGTGAACGGATTG     |
| Mouse - <i>Gapdh</i> -R                  | TGTAGACCATGTAGTTGAGGTCA  |
| Mouse - <i>Tnfa</i> -F                   | CTGAACTTCGGGGTGATCGG     |
| Mouse - <i>Tnfa</i> -R                   | GGCTTGTCACCTCGAATTTGAGA  |
| Mouse - <i>Il6</i> -F                    | TAGTCCTTCCACCCCAATTTCC   |
| Mouse - <i>Il6</i> -R                    | TTGGTCCTTAGCCACTCCTTC    |
| Mouse - <i>Cramp</i> -F                  | GCTGTGGCGTCACTATCAC      |
| Mouse - <i>Cramp</i> -R                  | TGTCTAGGGACTGCTGGTTGA    |
| Mouse - <i>Nfkb1</i> -F                  | ATGGCAGACGATGATCCCTAC    |
| Mouse - <i>Nfkb1</i> -R                  | TGTTGACAGTGGTATTTCTGGTG  |
| Mouse - <i>Nfkb2</i> -F                  | GGCCGGAAGACCTATCCTACT    |
| Mouse - <i>Nfkb2</i> -R                  | CTACAGACACAGCGCACACT     |
| Mouse - <i>Rela</i> -F                   | AGGCTTCTGGGCCTTATGTG     |
| Mouse - <i>Rela</i> -R                   | TGCTTCTCTCGCCAGGAATAC    |
| Mouse - <i>Relb</i> -F                   | CCGTACCTGGTCATCACAGAG    |
| Mouse - <i>Relb</i> -R                   | CAGTCTCGAAGCTCGATGGC     |
| Mouse - <i>Cxcl10</i> -F                 | CCAAGTGCTGCCGTCATTTTC    |
| Mouse - <i>Cxcl10</i> -R                 | GGCTCGCAGGGATGATTTCAA    |
| Mouse - <i>Cxcl11</i> -F                 | GGCTTCCTTATGTTCAAACAGGG  |
| Mouse - <i>Cxcl11</i> -R                 | GCCGTTACTCGGGTAAATTACA   |
| Mouse - <i>Cxcl12</i> -F                 | TGCATCAGTGACGGTAAACCA    |
| Mouse - <i>Cxcl12</i> -R                 | TTCTTCAGCCGTGCAACAATC    |

|                                          |                         |
|------------------------------------------|-------------------------|
| Mouse - <i>Ccl2</i> -F                   | TTAAAAACCTGGATCGGAACCAA |
| Mouse - <i>Ccl2</i> -R                   | GCATTAGCTTCAGATTTACGGGT |
| Mouse - <i>Ccl3</i> -F                   | TTCTCTGTACCATGACACTCTGC |
| Mouse - <i>Ccl3</i> -R                   | CGTGGAATCTTCCGGCTGTAG   |
| Mouse - <i>Ccl5</i> -F                   | GCTGCTTTGCCTACCTCTCC    |
| Mouse - <i>Ccl5</i> -R                   | TCGAGTGACAAACACGACTGC   |
| Mouse - <i>Il1<math>\alpha</math></i> -F | CGAAGACTACAGTTCTGCCATT  |
| Mouse - <i>Il1<math>\alpha</math></i> -R | GACGTTTCAGAGGTTCTCAGAG  |
| Mouse - <i>Il1<math>\beta</math></i> -F  | GCAACTGTTTCCTGAACTCAACT |
| Mouse - <i>Il1<math>\beta</math></i> -R  | ATCTTTTGGGGTCCGTCAACT   |
| Mouse - <i>Mmp9</i> -F                   | CTGGACAGCCAGACACTAAAG   |
| Mouse - <i>Mmp9</i> -R                   | CTCGCGCAAGTCTTCAGAG     |
| Mouse - <i>Cxcr3</i> -F                  | TACCTTGAGGTTAGTGAACGTCA |
| Mouse - <i>Cxcr3</i> -R                  | CGCTCTCGTTTTCCTCCATAATC |
| Mouse - <i>Vegf</i> -F                   | TATTCAGCGGACTCACCAGC    |
| Mouse - <i>Vegf</i> -R                   | AACCAACCTCCTCAAACCGT    |

**Appendix Table S3. CEA and IGA score and score change for rosacea patients after topical rapamycin treatment.**

|                  | CEA |     |        | IGA |     |        |
|------------------|-----|-----|--------|-----|-----|--------|
|                  | 0 W | 4 W | Change | 0 W | 4 W | Change |
| <b>Placebo</b>   |     |     |        |     |     |        |
| Patient 1        | 2   | 2   | 0      | 3   | 3   | 0      |
| Patient 2        | 3   | 3   | 0      | 3   | 3   | 0      |
| Patient 3        | 1   | 2   | 1      | 1   | 1   | 0      |
| Patient 4        | 2   | 2   | 0      | 3   | 3   | 0      |
| Patient 5        | 2   | 2   | 0      | 1   | 1   | 0      |
| Patient 6        | 2   | 2   | 0      | 2   | 2   | 0      |
| Patient 7        | 4   | 3   | -1     | 3   | 3   | 0      |
| Patient 8        | 4   | 3   | -1     | 4   | 3   | -1     |
| <b>Rapamycin</b> |     |     |        |     |     |        |
| Patient 1        | 3   | 1   | -2     | 3   | 1   | -2     |
| Patient 2        | 3   | 2   | -1     | 3   | 1   | -2     |
| Patient 3        | 3   | 2   | -1     | 4   | 2   | -2     |
| Patient 4        | 2   | 2   | 0      | 3   | 2   | -1     |
| Patient 5        | 2   | 2   | 0      | 3   | 2   | -1     |
| Patient 6        | 2   | 1   | -1     | 2   | 2   | 0      |
| Patient 7        | 3   | 2   | -1     | 2   | 2   | 0      |
| Patient 8        | 2   | 2   | 0      | 2   | 1   | -1     |
| Patient 9        | 3   | 2   | -1     | 3   | 2   | -1     |
| Patient 10       | 3   | 1   | -2     | 3   | 1   | -2     |

**Appendix Table S4. Summary of significant P values for Main and appendix figures.**

|                  |                                                                                                                                                                                                                                                                                                                                                                                                                                                                                                                                                                                                                                                                                                                                                                                                                                                                                                                                                                                                                                                              |
|------------------|--------------------------------------------------------------------------------------------------------------------------------------------------------------------------------------------------------------------------------------------------------------------------------------------------------------------------------------------------------------------------------------------------------------------------------------------------------------------------------------------------------------------------------------------------------------------------------------------------------------------------------------------------------------------------------------------------------------------------------------------------------------------------------------------------------------------------------------------------------------------------------------------------------------------------------------------------------------------------------------------------------------------------------------------------------------|
| Figure 1D        | P = 0.018                                                                                                                                                                                                                                                                                                                                                                                                                                                                                                                                                                                                                                                                                                                                                                                                                                                                                                                                                                                                                                                    |
| Figure 1G        | P = 0.0019                                                                                                                                                                                                                                                                                                                                                                                                                                                                                                                                                                                                                                                                                                                                                                                                                                                                                                                                                                                                                                                   |
| Figure 2E        | WT: LL37vsControl P<0.0001; LL37: Raptor cKOvsWT P<0.0001;                                                                                                                                                                                                                                                                                                                                                                                                                                                                                                                                                                                                                                                                                                                                                                                                                                                                                                                                                                                                   |
| Figure 2F (Tnfa) | WT: LL37vsControl P=0.0007; LL37: Raptor cKOvsWT P=0.007;                                                                                                                                                                                                                                                                                                                                                                                                                                                                                                                                                                                                                                                                                                                                                                                                                                                                                                                                                                                                    |
| Figure 2F (Il6)  | WT: LL37vsControl P<0.0001; LL37: Raptor cKOvsWT P=0.0016;                                                                                                                                                                                                                                                                                                                                                                                                                                                                                                                                                                                                                                                                                                                                                                                                                                                                                                                                                                                                   |
| Figure 2F (Mmp9) | WT: LL37vsControl P=0.0077; LL37: Raptor cKOvsWT P=0.00285;                                                                                                                                                                                                                                                                                                                                                                                                                                                                                                                                                                                                                                                                                                                                                                                                                                                                                                                                                                                                  |
| Figure 2F (Vegf) | WT: LL37vsControl P<0.0001; LL37: Raptor cKOvsWT P<0.0001;                                                                                                                                                                                                                                                                                                                                                                                                                                                                                                                                                                                                                                                                                                                                                                                                                                                                                                                                                                                                   |
| Figure 2J        | WT: LL37vsControl P<0.0001; LL37: Raptor cKOvsWT P<0.0001;                                                                                                                                                                                                                                                                                                                                                                                                                                                                                                                                                                                                                                                                                                                                                                                                                                                                                                                                                                                                   |
| Figure 3B        | <p><b>Day 0.5</b> <b>P value</b></p> <p>WT-PBS vs. WT-LL37 0.9505</p> <p>WT-PBS vs. TSC2-PBS &gt;0.9999</p> <p>WT-PBS vs. TSC2-LL37 &lt;0.0001</p> <p>WT-LL37 vs. TSC2-PBS 0.9590</p> <p>WT-LL37 vs. TSC2-LL37 &lt;0.0001</p> <p>TSC2-PBS vs. TSC2-LL37 &lt;0.0001</p> <p><b>Day 2</b> <b>P value</b></p> <p>WT-PBS vs. WT-LL37 &lt;0.0001</p> <p>WT-PBS vs. TSC2-PBS &gt;0.9999</p> <p>WT-PBS vs. TSC2-LL37 &lt;0.0001</p> <p>WT-LL37 vs. TSC2-PBS &lt;0.0001</p> <p>WT-LL37 vs. TSC2-LL37 &lt;0.0001</p> <p>TSC2-PBS vs. TSC2-LL37 &lt;0.0001</p> <p><b>Day 5</b> <b>P value</b></p> <p>WT-PBS vs. WT-LL37 &lt;0.0001</p> <p>WT-PBS vs. TSC2-PBS &gt;0.9999</p> <p>WT-PBS vs. TSC2-LL37 &lt;0.0001</p> <p>WT-LL37 vs. TSC2-PBS &lt;0.0001</p> <p>WT-LL37 vs. TSC2-LL37 &lt;0.0001</p> <p>TSC2-PBS vs. TSC2-LL37 &lt;0.0001</p> <p><b>Day 8</b> <b>P value</b></p> <p>WT-PBS vs. WT-LL37 0.5044</p> <p>WT-PBS vs. TSC2-PBS &gt;0.9999</p> <p>WT-PBS vs. TSC2-LL37 &lt;0.0001</p> <p>WT-LL37 vs. TSC2-PBS 0.5044</p> <p>WT-LL37 vs. TSC2-LL37 &lt;0.0001</p> |

|           |                                                                                                                                                                                                                                                                                                                                                                                                                                                                                                                                                                                                                                                                                                                                                                                                                                                                                                                                                                                                                                                                                                                                                                                                                                                                                                                                                                             |
|-----------|-----------------------------------------------------------------------------------------------------------------------------------------------------------------------------------------------------------------------------------------------------------------------------------------------------------------------------------------------------------------------------------------------------------------------------------------------------------------------------------------------------------------------------------------------------------------------------------------------------------------------------------------------------------------------------------------------------------------------------------------------------------------------------------------------------------------------------------------------------------------------------------------------------------------------------------------------------------------------------------------------------------------------------------------------------------------------------------------------------------------------------------------------------------------------------------------------------------------------------------------------------------------------------------------------------------------------------------------------------------------------------|
|           | <p>TSC2-PBS vs. TSC2-LL37 &lt;0.0001</p> <p><b>Day 12</b> <b>P value</b></p> <p>WT-PBS vs. WT-LL37 &gt;0.9999</p> <p>WT-PBS vs. TSC2-PBS &gt;0.9999</p> <p>WT-PBS vs. TSC2-LL37 0.0756</p> <p>WT-LL37 vs. TSC2-PBS &gt;0.9999</p> <p>WT-LL37 vs. TSC2-LL37 0.0756</p> <p>TSC2-PBS vs. TSC2-LL37 0.0756</p>                                                                                                                                                                                                                                                                                                                                                                                                                                                                                                                                                                                                                                                                                                                                                                                                                                                                                                                                                                                                                                                                  |
| Figure 3C | <p><b>Day 0.5</b> <b>P value</b></p> <p>WT-PBS vs. WT-LL37 0.9375</p> <p>WT-PBS vs. TSC2-PBS &gt;0.9999</p> <p>WT-PBS vs. TSC2-LL37 &lt;0.0001</p> <p>WT-LL37 vs. TSC2-PBS 0.9375</p> <p>WT-LL37 vs. TSC2-LL37 &lt;0.0001</p> <p>TSC2-PBS vs. TSC2-LL37 &lt;0.0001</p> <p><b>Day 2</b> <b>P value</b></p> <p>WT-PBS vs. WT-LL37 &lt;0.0001</p> <p>WT-PBS vs. TSC2-PBS 0.9375</p> <p>WT-PBS vs. TSC2-LL37 &lt;0.0001</p> <p>WT-LL37 vs. TSC2-PBS &lt;0.0001</p> <p>WT-LL37 vs. TSC2-LL37 &lt;0.0001</p> <p>TSC2-PBS vs. TSC2-LL37 &lt;0.0001</p> <p><b>Day 5</b> <b>P value</b></p> <p>WT-PBS vs. WT-LL37 &lt;0.0001</p> <p>WT-PBS vs. TSC2-PBS 0.9376</p> <p>WT-PBS vs. TSC2-LL37 &lt;0.0001</p> <p>WT-LL37 vs. TSC2-PBS &lt;0.0001</p> <p>WT-LL37 vs. TSC2-LL37 &lt;0.0001</p> <p>TSC2-PBS vs. TSC2-LL37 &lt;0.0001</p> <p><b>Day 8</b> <b>P value</b></p> <p>WT-PBS vs. WT-LL37 0.9375</p> <p>WT-PBS vs. TSC2-PBS &gt;0.9999</p> <p>WT-PBS vs. TSC2-LL37 &lt;0.0001</p> <p>WT-LL37 vs. TSC2-PBS 0.9375</p> <p>WT-LL37 vs. TSC2-LL37 &lt;0.0001</p> <p>TSC2-PBS vs. TSC2-LL37 &lt;0.0001</p> <p><b>Day 12</b> <b>P value</b></p> <p>WT-PBS vs. WT-LL37 &gt;0.9999</p> <p>WT-PBS vs. TSC2-PBS &gt;0.9999</p> <p>WT-PBS vs. TSC2-LL37 &lt;0.0001</p> <p>WT-LL37 vs. TSC2-PBS &gt;0.9999</p> <p>WT-LL37 vs. TSC2-LL37 &lt;0.0001</p> <p>TSC2-PBS vs. TSC2-LL37 &lt;0.0001</p> |



|                            |                                                                |
|----------------------------|----------------------------------------------------------------|
| Figure 3E                  | WT: LL37vsControl P<0.0001; LL37: Raptor cKOvsWT P = 0.01;     |
| Figure 4D                  | WT: LL37vsControl P<0.0001; LL37: Raptor cKOvsWT P<0.0001;     |
| Figure 6D                  | P<0.0001 (LL37 vs Control); P<0.0001 (LL37 vs LL37+RAPA)       |
| Figure 6F                  | WT: LL37vsControl P<0.0001; LL37: Raptor cKOvsWT P<0.0001;     |
| Figure 6G (Nfkb1)          | WT: LL37vsControl P<0.0001; LL37: Raptor cKOvsWT P<0.0001;     |
| Figure 6G (Nfkb2)          | WT: LL37vsControl P<0.0001; LL37: Raptor cKOvsWT P<0.0001;     |
| Figure 6G (Rela)           | WT: LL37vsControl P<0.0001; LL37: Raptor cKOvsWT P<0.0001;     |
| Figure 6G (Relb)           | WT: LL37vsControl P<0.0001; LL37: Raptor cKOvsWT P<0.0001;     |
| Figure 6J                  | P= 0.0002;                                                     |
| Figure 7A                  | P=0.0025 (LL37 vs Control); P=0.0024 (LL37 vs LL37+RAPA)       |
| Figure 7B (Cxcl11)         | WT: LL37vsControl P=0.001; LL37: Raptor cKOvsWT P=0.0294;      |
| Figure 7B (Cxcl12)         | WT: LL37vsControl P<0.0001; LL37: Raptor cKOvsWT P=0.0022;     |
| Figure 7B (Cc12)           | WT: LL37vsControl P<0.0001; LL37: Raptor cKOvsWT P=0.0005;     |
| Figure 7B (Cc13)           | WT: LL37vsControl P<0.0001; LL37: Raptor cKOvsWT P=0.0014;     |
| Figure 7C (CCL3)           | DMSO: LL37vsControl P=0.0001; LL37: RAPAvsDMSO P=0.0005;       |
| Figure 7C (CXCL9)          | DMSO: LL37vsControl P<0.0001; LL37: RAPAvsDMSO P<0.0001;       |
| Figure 7C (CXCL10)         | DMSO: LL37vsControl P=0.0016; LL37: RAPAvsDMSO P=0.0045;       |
| Figure 7C (CXCL11)         | DMSO: LL37vsControl P=0.0021; LL37: RAPAvsDMSO P=0.0012;       |
| Figure 7D                  | P=0.006;                                                       |
| Appendix Figure S1B        | P< 0.0001;                                                     |
| Appendix Figure S2F        | Vehicle: LL37vsControl P<0.0001; LL37: RAPAvsVehicle P<0.0001; |
| Appendix Figure S2G (Tnfa) | Vehicle: LL37vsControl P<0.0001; LL37: RAPAvsVehicle P<0.0001; |
| Appendix Figure S2G (Il6)  | Vehicle: LL37vsControl P<0.0001; LL37:                         |

|                              |                                                                 |
|------------------------------|-----------------------------------------------------------------|
|                              | RAPAvsVehicle P=0.0004;                                         |
| Appendix Figure S2G (Mmp9)   | Vehicle: LL37vsControl P=0.0003; LL37: RAPAvsVehicle P=0.0035;  |
| Appendix Figure S2G (Vegf)   | Vehicle: LL37vsControl P<0.0001; LL37: RAPAvsVehicle P<0.0001;  |
| Appendix Figure S4B          | DMSO: LL37vsControl P=0.0008; LL37: RAPAvsDMSO P=0.0027;        |
| Appendix Figure S4D          | DMSO: LL37vsControl P=0.0028; LL37: RAPAvsDMSO P=0.0145;        |
| Appendix Figure S6A (Il1a)   | WT: LL37vsControl P=0.0028; LL37: Raptor cKOvsVehicle P<0.0001; |
| Appendix Figure S6A (Il1b)   | WT: LL37vsControl P=0.0022; LL37: Raptor cKOvsVehicle P=0.04;   |
| Appendix Figure S6C (Nfkb1)  | Vehicle: LL37vsControl P<0.0001; LL37: RAPAvsVehicle P<0.0001;  |
| Appendix Figure S6C (Nfkb2)  | Vehicle: LL37vsControl P<0.0001; LL37: RAPAvsVehicle P<0.0001;  |
| Appendix Figure S6C (Rela)   | Vehicle: LL37vsControl P<0.0001; LL37: RAPAvsVehicle P<0.0001;  |
| Appendix Figure S6C (Relb)   | Vehicle: LL37vsControl P<0.0001; LL37: RAPAvsVehicle P<0.0001;  |
| Appendix Figure S6D (left)   | DMSO: LL37vsControl P=0.0017; LL37: RAPAvsDMSO P=0.0022;        |
| Appendix Figure S6D (right)  | DMSO: LL37vsControl P<0.0001; LL37: RAPAvsDMSO P<0.0001;        |
| Appendix Figure S7A (Cxcl10) | Vehicle: LL37vsControl P=0.0028; LL37: RAPAvsVehicle P=0.0016;  |
| Appendix Figure S7A (Cxcl11) | Vehicle: LL37vsControl P=0.04; LL37: RAPAvsVehicle P=0.03;      |
| Appendix Figure S7A (Ccl3)   | Vehicle: LL37vsControl P=0.0029; LL37: RAPAvsVehicle P=0.0056;  |
| Appendix Figure S7A (Ccl5)   | Vehicle: LL37vsControl P=0.019; LL37: RAPAvsVehicle P=0.022;    |
| Appendix Figure S7AB(CCL3)   | P=0.0219;                                                       |
| Appendix Figure S7AB(CCL5)   | P=0.0017;                                                       |
| Appendix Figure S7AB(CXCL8)  | P=0.031;                                                        |
| Appendix Figure S7AB(CXCL9)  | P=0.0147;                                                       |
| Appendix Figure S7AB(CXCL10) | P=0.0045;                                                       |
| Appendix Figure S7AB(CXCL11) | P=0.0068;                                                       |
| Appendix Figure S7AB(CXCR3)  | P=0.0208;                                                       |
| Appendix Figure S7AB(CXCR6)  | P<0.0001;                                                       |
